# Supplementary material
Source: PubMed Central journal article supplement (PMC2647702)
Supplement: tlo0201_0046SD1.pdf [file tlo0201_0046SD1.pdf]

**Table W1.** Analysis of PL104 Cell Surface Antigens.

|         | Result          |
|---------|-----------------|
| CD2     | Negative        |
| CD3     | Negative        |
| CD4     | Negative        |
| CD5     | Negative        |
| CD7     | Negative        |
| CD8     | Negative        |
| CD10    | Negative        |
| CD11b   | Negative        |
| CD13    | Negative        |
| CD14    | Negative        |
| CD15    | Negative        |
| CD16    | Negative        |
| CD19    | <b>Positive</b> |
| CD20    | <b>Positive</b> |
| CD22    | <b>Positive</b> |
| CD33    | Negative        |
| CD34    | Negative        |
| CD38    | <b>Positive</b> |
| CD41a   | Negative        |
| CD45    | <b>Positive</b> |
| CD56    | Negative        |
| CD64    | Negative        |
| CD71    | <b>Positive</b> |
| CD79a   | <b>Positive</b> |
| CD117   | Negative        |
| MPO     | Negative        |
| HLA DR  | <b>Positive</b> |
| λ chain | <b>Positive</b> |
| κ chain | Negative        |

Immunophenotypic profile of PL104 cells assessed by flow cytometry. A positive result was considered when the comparison of the staining pattern of a certain antibody (defined as a percentage) was 20% over the corresponding percentage of the isotypic control.

Data in **boldface** emphasis correspond to  $P < .001$ .

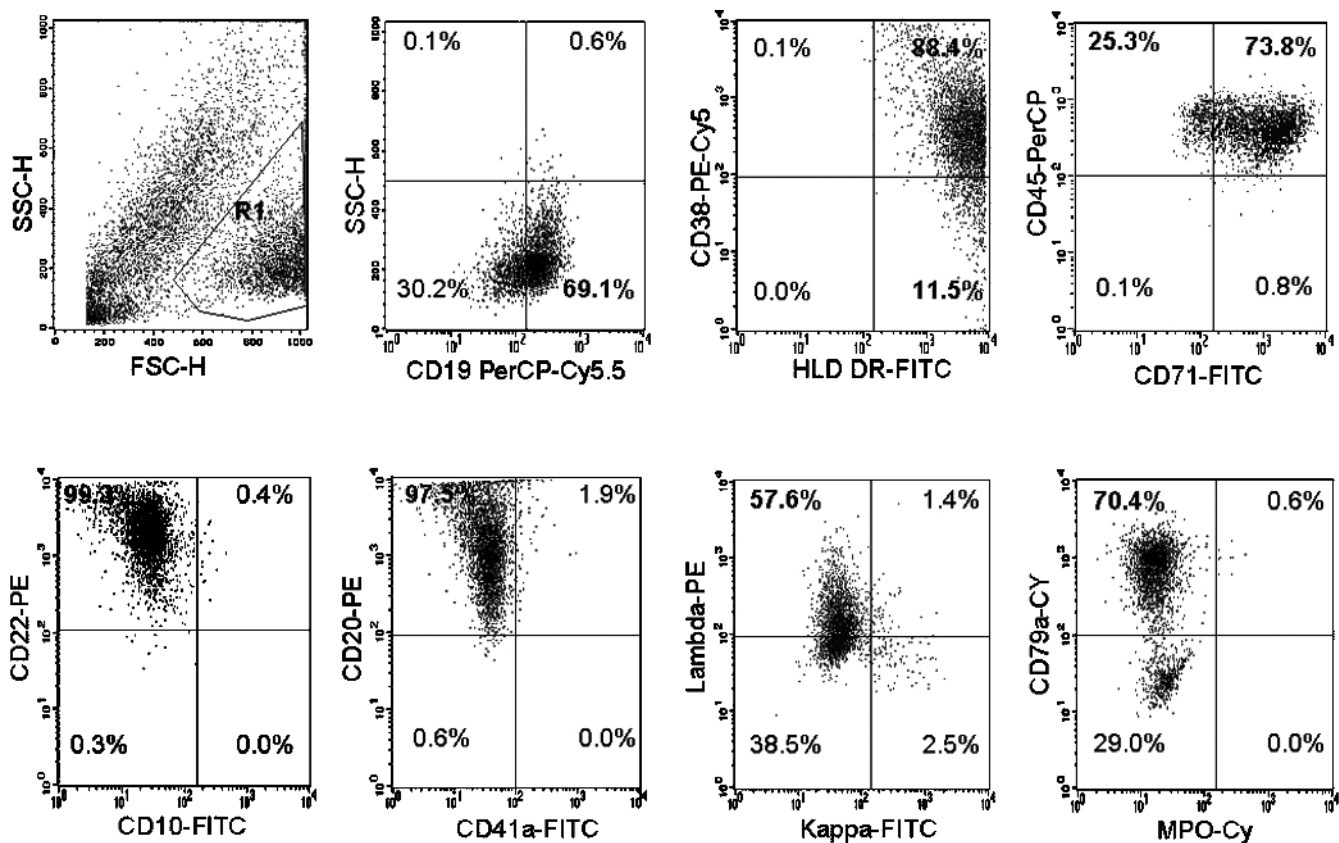

**Figure W1.** PL104 cells correspond to mature B monoclonal lymphocytes. Dot pot graphics showing positive CD expression on PL104 assessed by flow cytometry.
